# Supplementary material for: Glucosamine sulphate-loaded distearoyl phosphocholine liposomes for osteoarthritis treatment: combination of sustained drug release and improved lubrication
Source: Royal Society of Chemistry journal article supplement (doi:10.1039/c9bm00201d), 2019-01-01
Supplement: c9bm00201d1.pdf [file c9bm00201d1.pdf]

## Supporting Information

### **Glucosamine sulphate-loaded distearoyl phosphocholine liposomes for osteoarthritis treatment: combination of sustained drug release and improved lubrication**

Xiuling Ji,<sup>†a</sup> Yufei Yan,<sup>†b</sup> Tao Sun,<sup>a</sup> Qiang Zhang,<sup>c</sup> Yixin Wang,<sup>a</sup> Ming Zhang,<sup>c</sup> Hongyu Zhang,<sup>\*a</sup> and  
Xin Zhao<sup>\*c</sup>

*<sup>a</sup>State Key Laboratory of Tribology, Department of Mechanical Engineering, Tsinghua University, Beijing 100084, China*

*<sup>b</sup>Shanghai Key Laboratory for Prevention and Treatment of Bone and Joint Diseases, Shanghai Institute of Traumatology and Orthopaedics, Ruijin Hospital, Shanghai Jiao Tong University School of Medicine, Shanghai 200025, China*

*<sup>c</sup>Department of Biomedical Engineering, The Hong Kong Polytechnic University, Hung Hom, Hong Kong SAR, China*

<sup>†</sup>These authors contributed equally to this work.

\*Correspondence to:

Hongyu Zhang, E-mail: zhanghyu@tsinghua.edu.cn. Tel: +86 010 62796053.

Xin Zhao, Email: xin.zhao@polyu.edu.hk. Tel: +852 3400 8083.

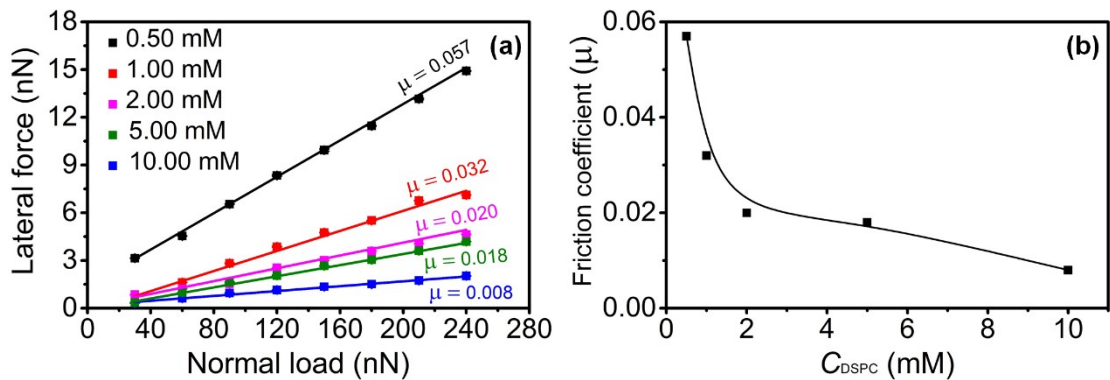

**Fig. S1.** (a) Lateral force as a function of normal load of the DSPC liposomes at a 2.00 Hz scanning speed. (b) Friction coefficient as a function of DSPC concentration.

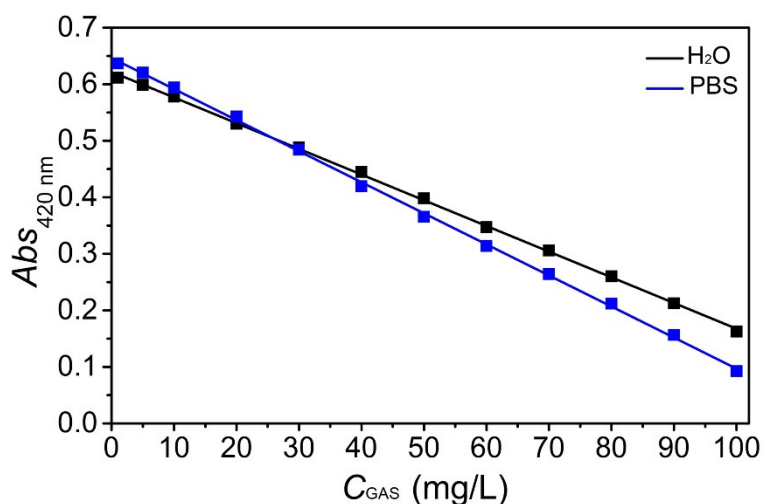

**Fig. S2.** GAS calibration curves obtained in H<sub>2</sub>O and PBS as the medium.

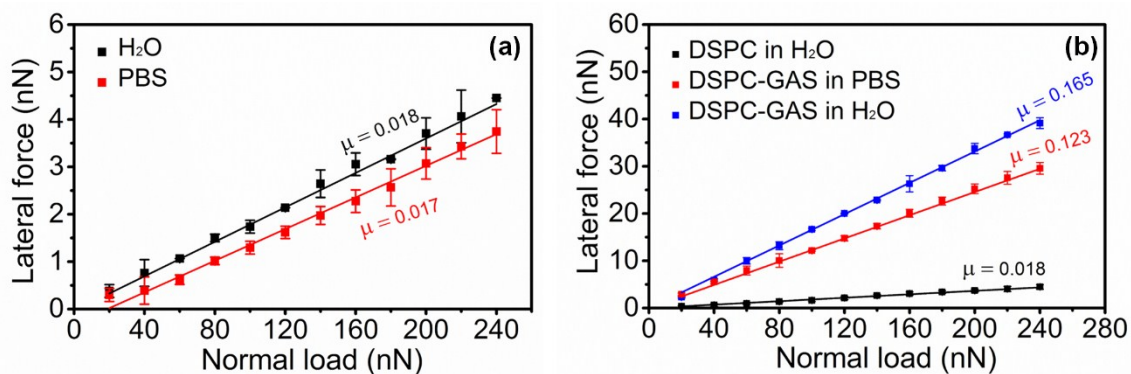

**Fig. S3.** Lateral force as a function of normal load of the 5.0 mM DSPC liposomes in H<sub>2</sub>O and PBS (a) and of the DSPC liposomes and DSPC-GAS liposomes prepared with 2:8 molar ratio at 5.0 mM DSPC concentration after dialyzing for 14 days at a 2.00 Hz scanning speed.

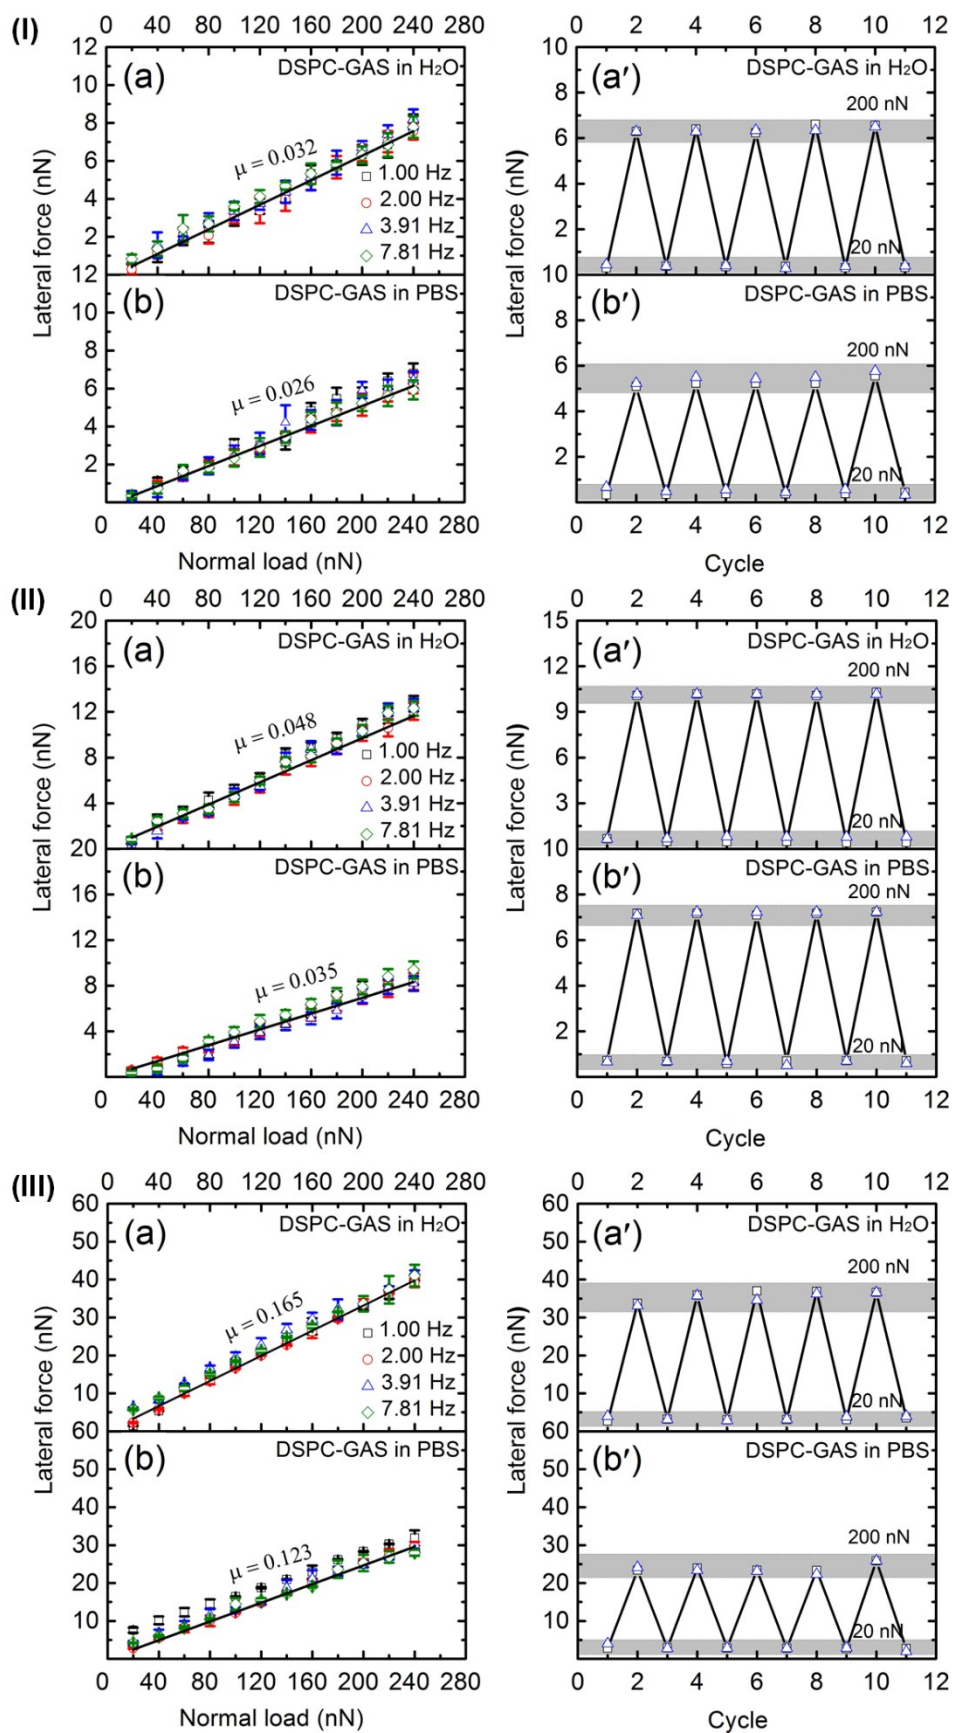

**Fig. S4.** Lateral force as a function of normal load (Left) under four different scanning speeds (1.00,

2.00, 3.91 and 7.81 Hz) and of cycle (Right) under a high load ( $F_N = 200$  nN) and a low load ( $F_N = 20$  nN) at a 2.00 Hz scanning speed. The data were shown from runs at two different positions with five steps (from increasing load to reducing load as one step). GAS-loaded DSPC liposomes separately dialyzed for (I) 3 days, (II) 7 days and (III) 14 days were prepared with a 2:8 molar ratio at the DSPC concentration of 5.0 mM in H<sub>2</sub>O and PBS. The temperature was set as 37°C.

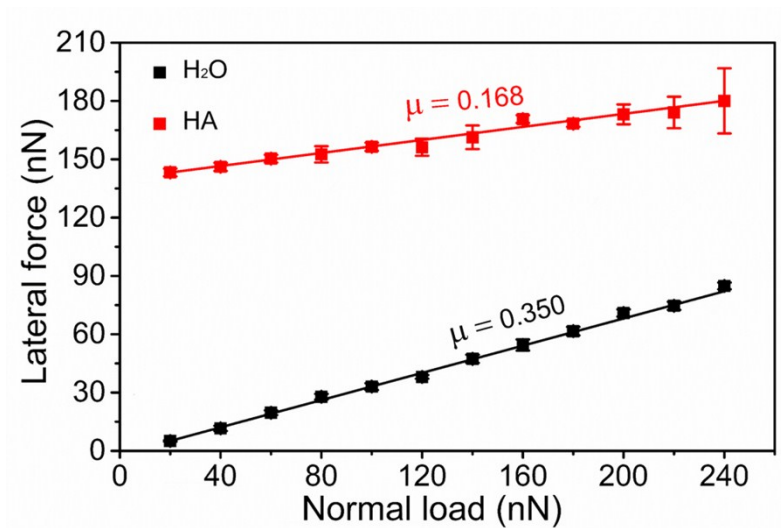

**Fig. S5.** Lateral force as a function of normal load for H<sub>2</sub>O and 5.0 mg/mL HA.

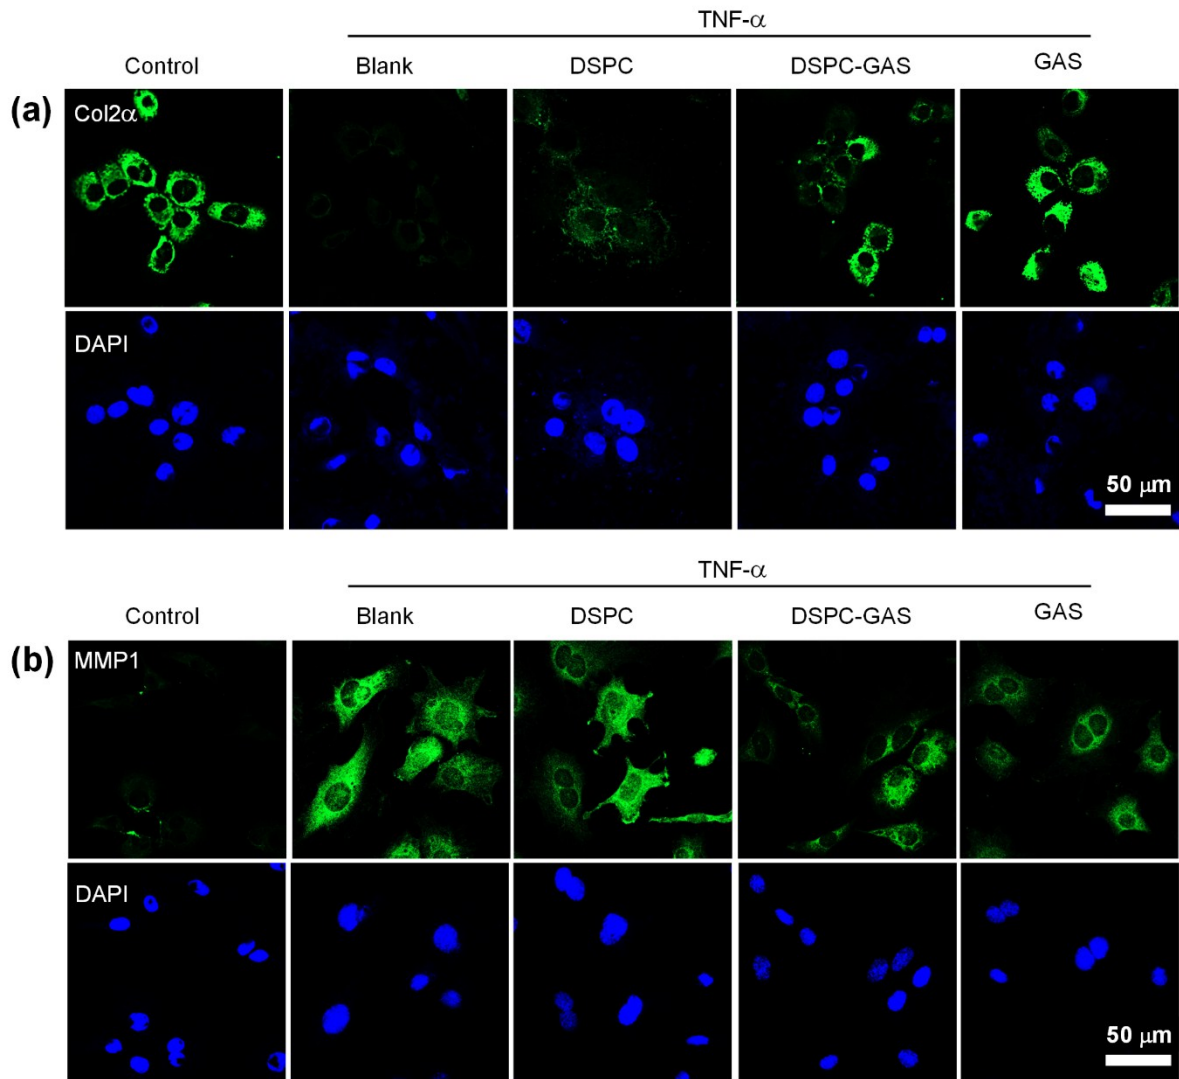

**Fig. S6.** Representative photomicrographs of chondrocytes treated with 5 nM of TNF- $\alpha$ , and cultured with DSPC, DSPC-GAS liposomes or free GAS for 12 h. Results were acquired using laser scanning confocal microscopy. Green: Alexa Fluor (488) labeling (a) Col2 $\alpha$  or (b) MMP1. Blue: DAPI labeling cell nuclei.
